# Supplementary material
Source: PubMed Central journal article supplement (PMC8312022)
Supplement: Supp_FigS1.pdf [file Supp_FigS1.pdf]

## Supplemental Figure 1: Decreased CD30 RNA in T cells from LSIN-5F11-CD828Z-transduced T cells versus untransduced T cells

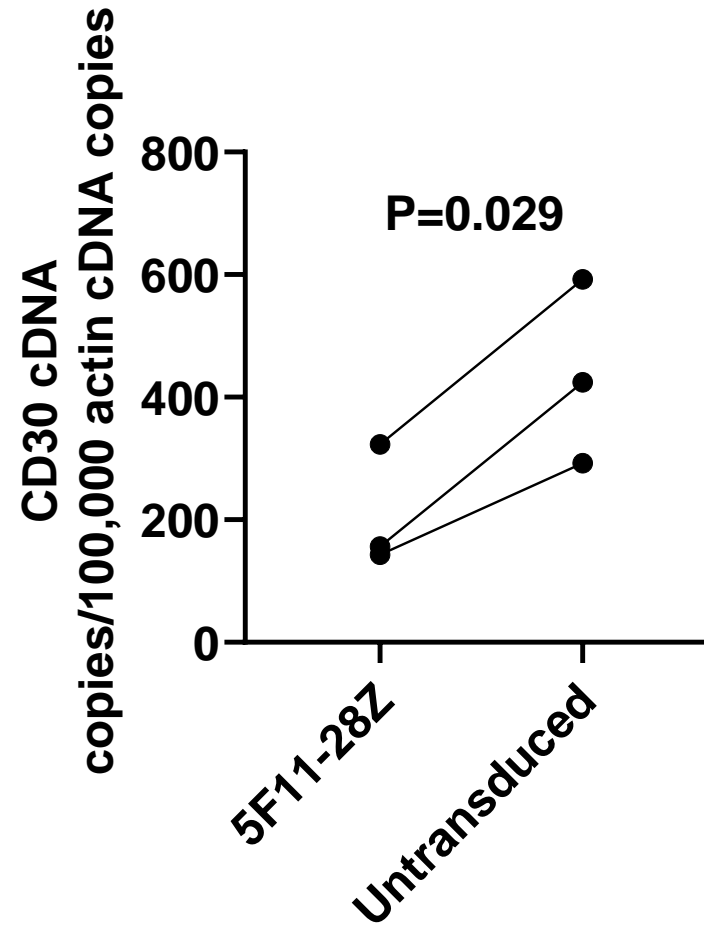

**Supplemental Figure 1. CD30 qPCR in cultured T cells.** T cells from 3 human donors were transduced with LSIN-5F11-28Z or left untransduced. On day 7 of culture, RNA was extracted from all 3 transduced T-cell cultures, and all 3 untransduced T-cell cultures; cDNA was synthesized from the RNA. Quantitative PCR was performed on the cDNA for both CD30 and actin. Results are presented as CD30 transcript copies per 100,000 actin transcript copies. Lines connect paired sets of LSIN-5F11-28Z-transduced and untransduced cultures from each donor.  $P=0.029$  by paired two-tailed T test;  $n=3$  pairs.  $P<0.05$  was statistically significant.
