# Supplementary material
Source: PubMed Central journal article supplement (PMC8312022)
Supplement: Supp_FigS2.pdf [file Supp_FigS2.pdf]

## Supplemental Figure 2: Anti-tumor activity of 5F11-28Z versus HRS3-28Z

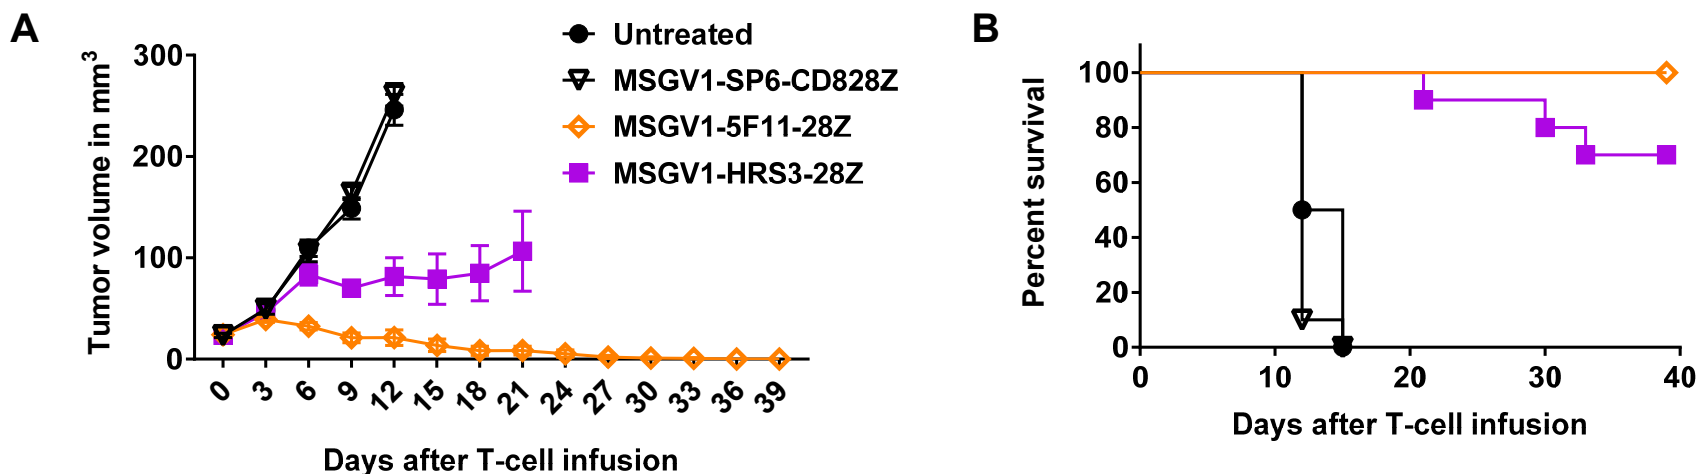

**Supplemental Figure 2. Comparison of anti-tumor activity of T cells transduced with MSGV1-5F11-28Z versus T cells transduced with MSGV1-HRS3-28Z.** Tumors were established in NSG mice by intradermal injection of HH cells. When palpable tumors were present, mice received infusions of T cells that were either untransduced or transduced with one of the indicated CARs. The 5F11-28Z and HRS3-28Z CARs were the same except for having different scFvs. MSGV1-SP6-CD828Z-transduced T cells were included as a negative control. (A) Tumor volumes (mean $\pm$ SEM) for the different groups are shown. The graphs show the combined results of 2 experiments of 5 mice per experiment, so n=10 for each group. Day 0 was the day of intravenous infusions of  $6 \times 10^6$  T cells expressing the indicated CARs. Tumor size curves end when the 1<sup>st</sup> mouse of a group died. At day 21, there was a statistically significant difference in tumor size between MSGV1-5F11-28Z and MSGV1-HRS3-28Z;  $P=0.0014$  by 2-tailed Mann-Whitney test. (B) Kaplan-Meier survival plots of the same mice as in A are shown. There was a statistically significant difference ( $P<0.0001$ ) for the comparison of T cells transduced with either MSGV1-5F11-28Z or MSGV1-HRS3-28Z versus MSGV1-SP6-CD828Z. There was not a statistically significant difference ( $P=0.067$ ) when survival of mice receiving T cells transduced with MSGV1-5F11-28Z versus MSGV1-HRS3-28Z were compared. Survival comparisons were made by log-rank test.  $P<0.05$  was considered statistically significant.
