# Supplementary material
Source: PubMed Central journal article supplement (PMC8312022)
Supplement: Supp_TableS1.pdf [file Supp_TableS1.pdf]

## Supplemental Table 1: Multiple target cell ELISA

| CAR expressed by T cells | Targets |      |      |      |           |            | Primary CD34+ | T cells alone |
|--------------------------|---------|------|------|------|-----------|------------|---------------|---------------|
|                          | HH      | A549 | TC71 | Sol8 | Panc10.05 | MDA-MB-231 |               |               |
| <b>5F11-28Z</b>          | 126692  | 107  | 773  | 92   | 48        | 354        | 153           | 26            |
| <b>Untransduced</b>      | 508     | 20   | 28   | 33   | 12        | 163        | 71            | <12           |

**Supplemental Table 1.** T cells were transduced with LSIN-5F11-28Z CAR or left untransduced, as indicated in the far-left column. The T cells were cultured with the indicated target cells overnight, and then a standard IFN $\gamma$  ELISA was performed. HH is a CD30<sup>+</sup> lymphoma cell line. A549, TC71, Sol8, Panc10.05, and MDA-MB-231 are CD30-negative cells lines. Primary CD34<sup>+</sup> hematopoietic stem cells that were obtained from the blood of a patient who received granulocyte colony-stimulating factor were also included. As measured by flow cytometry, 95.8% of the LSIN-5F11-28Z-transduced T cells expressed the CAR.
