# Supplementary material
Source: PubMed Central journal article supplement (PMC8312022)
Supplement: Supp_TableS2.pdf [file Supp_TableS2.pdf]

## Supplemental Table 2: Effect of soluble CD30 on 5F11-28Z target-cell recognition

| CAR expressed by T cells | HH<br>0<br>μg/mL<br>CD30 | HH<br>5<br>μg/mL<br>CD30 | HH<br>1<br>μg/mL<br>CD30 | HH<br>0.2<br>μg/mL<br>CD30 | CCRF-<br>CEM | T<br>cells<br>with<br>no<br>target | T cells<br>with no<br>target<br>5 μg/mL<br>CD30 |
|--------------------------|--------------------------|--------------------------|--------------------------|----------------------------|--------------|------------------------------------|-------------------------------------------------|
| 5F11-28Z                 | 23021                    | 18690                    | 19920                    | 18403                      | 32           | <12                                | 278                                             |
| Untransduced             |                          |                          |                          |                            |              | 143                                | 123                                             |

**Supplemental Table 2.** T cells were transduced with LSIN-5F11 or left untransduced as indicated in the far-left column. The T cells were cultured with the indicated target cells overnight, and then a standard IFN $\gamma$  ELISA was performed. HH are CD30<sup>+</sup> cell lines. The numbers followed by μg/mL refer to the concentration of human CD30 protein added to the media during the entire time that the T cells and target cells were cultured together. The numerical values in the bottom two rows are pg/mL of IFN $\gamma$  released at the end of the culture period. By flow cytometry, 94.8% of the LSIN-5F11-28Z-transduced T cells expressed the CAR. This is one of two experiments with similar results.
