# Supplementary material
Source: PubMed Central journal article supplement (PMC8312022)
Supplement: Supp_TableS3.pdf [file Supp_TableS3.pdf]

### Supplemental Table 3: Interferon $\gamma$ ELISA of MSGV1-5F11-28Z versus MSGV1-HRS3-28Z

|                | CD30-BV173 | HH    | SUDHL-1 | CCRF-CEM | NGFR-BV173 | T cells alone | %CAR+ |
|----------------|------------|-------|---------|----------|------------|---------------|-------|
| Untransduced   | 32         | 35    | 21      | 11       | 65         | 10            | 0     |
| MSGV1-5F11-28Z | 7769       | 88764 | 13310   | 1405     | 303        | 41            | 68    |
| MSGV1-HRS3-28Z | 5399       | 32519 | 5006    | 576      | 817        | 693           | 77    |

**Supplemental Table 3. When cultured with CD30<sup>+</sup> target cells, IFN $\gamma$  release was higher for T cells transduced with MSGV1-5F11-28Z versus T cells transduced with MSGV1-HRS3-28Z.** We compared 5F11-28Z and HRS3-28Z. These CARs were identical except for the difference in the scFvs. Both CARs were encoded by the MSGV1 gamma-retroviral vector. T cells were cultured overnight with the target cells indicated on the top row of the table. An IFN $\gamma$  ELISA was then performed on the culture supernatants. CD30-BV173, HH, and SUDHL-1 were CD30<sup>+</sup>. CCRF-CEM and NGFR-BV173 were CD30-negative. The T-cell populations are indicated on the far-left column, and the percentages of the T cells that expressed the indicated CARs are shown in the far-right column. CAR expression was determined by staining with CD30-Fc-PE followed by flow cytometry. IFN $\gamma$  results are normalized for CAR expression. This is one of four experiments with similar results.
